# Supplementary material
Source: publisher figshare collection journal article supplement (https://acs.figshare.com/ndownloader/files/4129012)
Supplement: Supplementary file 1 [file 4129012]

## **Supporting Information for “Tissue Distribution, Maternal Transfer and**

### **Age-related Accumulation of Dechloranes in Chinese Sturgeon”**

Hui PENG, Kun ZHANG, Yi WAN, and Jianying HU\*

College of Urban and Environmental Sciences, Peking University, Beijing 100871, China

|         |   |
|---------|---|
| Tables  | 1 |
| Figures | 3 |

This supporting information provides figures, and tables addressing (1) recoveries and method detection limits of dechloranes; (2) the habitat of Chinese sturgeon; (3) relative contributions of dechlorane plus (DP) and dechlorinated DP in different tissues from Chinese sturgeon; (4) age related accumulation trends of Dec 602, syn-DP and anti-DP in eggs from Chinese sturgeon.

**SUPPORTING INFORMATION TALBE S1.** Recoveries (n=3) and Method

Detection Limits (MDLs) of Dechloranes in Tissue Samples of Chinese Sturgeon.

|                          | Recoveries (%) | MDLs (pg/g ww) |
|--------------------------|----------------|----------------|
| mirex                    | $72 \pm 5$     | 0.5            |
| Dec 602                  | $62 \pm 5$     | 0.1            |
| Dec 603                  | $73 \pm 4$     | 0.1            |
| syn-Cl <sub>11</sub> DP  | $78 \pm 12$    | 0.2            |
| anti-Cl <sub>11</sub> DP | $82 \pm 7$     | 0.2            |
| syn-DP                   | $84 \pm 8$     | 0.2            |
| anti-DP                  | $81 \pm 9$     | 0.2            |

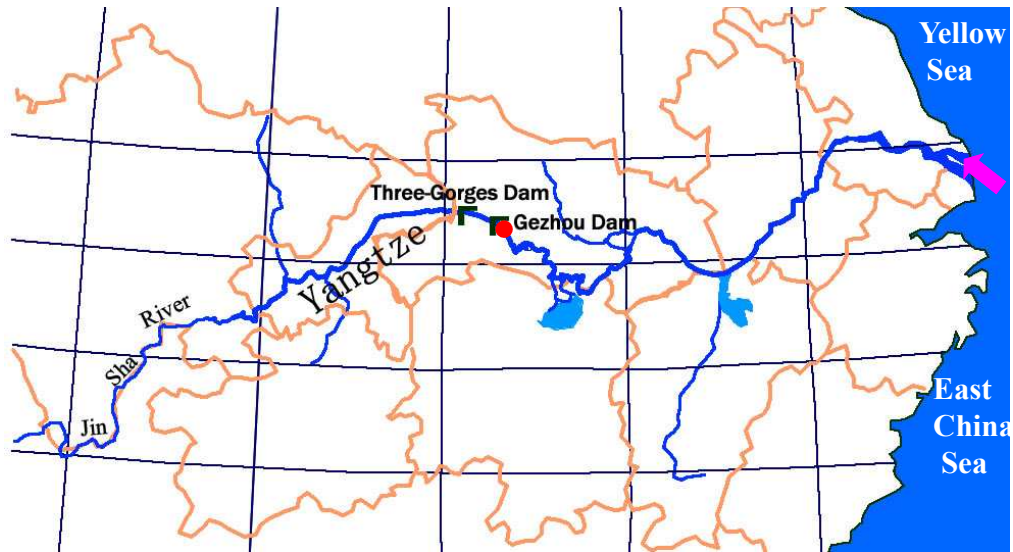

**FIGURE S1.** The habitat of Chinese sturgeon in sea and Yangtze River. ● Indicates the location where sturgeon was captured.

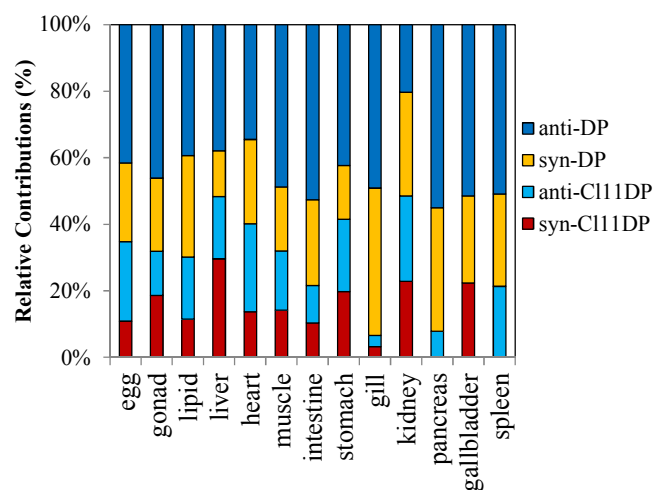

**FIGURE S2.** Relative contributions of dechlorane plus (DP) and dechlorinated DP in different tissues from Chinese sturgeon.

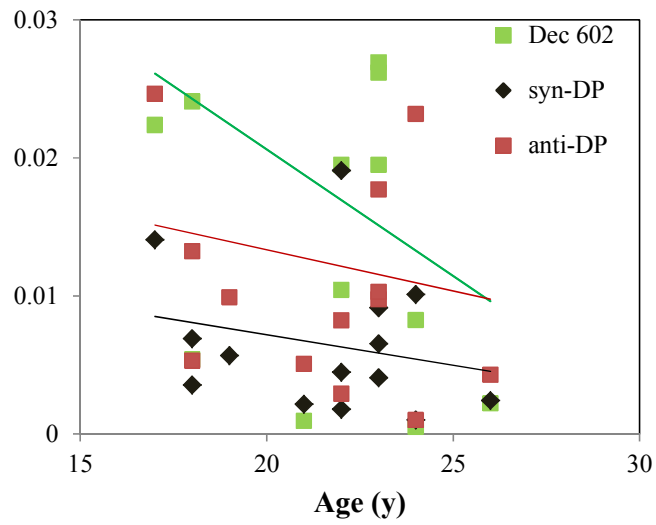

**FIGURE S3.** Age related accumulation trends of Dec 602, syn-DP and anti-DP in eggs from Chinese sturgeon.
